# Supplementary material
Source: publisher figshare collection journal article supplement (https://acs.figshare.com/ndownloader/files/13270655)
Supplement: Supplementary file 1 [file 13270655]

## Supporting Information

### NiCoP/CoP nanoparticles supported on Ti<sub>4</sub>O<sub>7</sub> as the electrocatalyst possessing an excellent catalytic performance towards hydrogen evolution reaction

Dan Ma<sup>†,‡</sup>, Ruihao Li<sup>§</sup>, Zhilin Zheng<sup>†</sup>, Zhijun Jia<sup>†</sup>, Kai Meng<sup>†</sup>, Yi Wang<sup>†,\*</sup>,

Guangming Zhu<sup>‡,\*</sup>, Hui Zhang<sup>†</sup>, Tao Qi<sup>†</sup>

<sup>†</sup>*National Engineering Laboratory for Hydrometallurgical Cleaner Production Technology, Institute of Process Engineering, Chinese Academy of Sciences, No.1 North 2nd Road, Haidian District, Beijing 100190, China*

<sup>‡</sup>*School of Natural and Applied sciences, Northwestern Polytechnical University, No. 1 Dongxiang Road, Chang'an District, Xi'an 710072, China*

<sup>§</sup>*High School Affiliated to Fudan University, No. 383 Guoquan Road, Yangpu District, Shanghai 200433, China*

<sup>\*</sup>*Corresponding Authors: Y. Wang, Fax: (+86) 10 82544848-802, Tel: (+86) 10 82544967, E-mail: [wangyi@ipe.ac.cn](mailto:wangyi@ipe.ac.cn) ; G. Zhu, E-mail: [gmzhu@nwpu.edu.cn](mailto:gmzhu@nwpu.edu.cn)*

#### This file include:

|                             |              |
|-----------------------------|--------------|
| <b>Figure S1-S9</b>         | <b>S2-S6</b> |
| <b>Table S1</b>             | <b>S7</b>    |
| <b>Experimental section</b> | <b>S7-S8</b> |

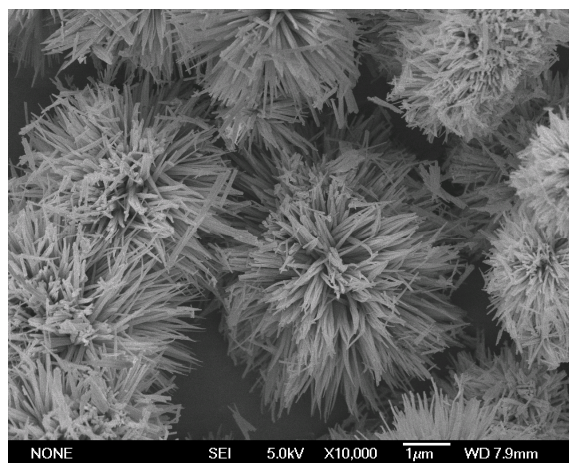

**Figure S1.** SEM image of  $\text{NiCo}_2\text{O}_4$ .

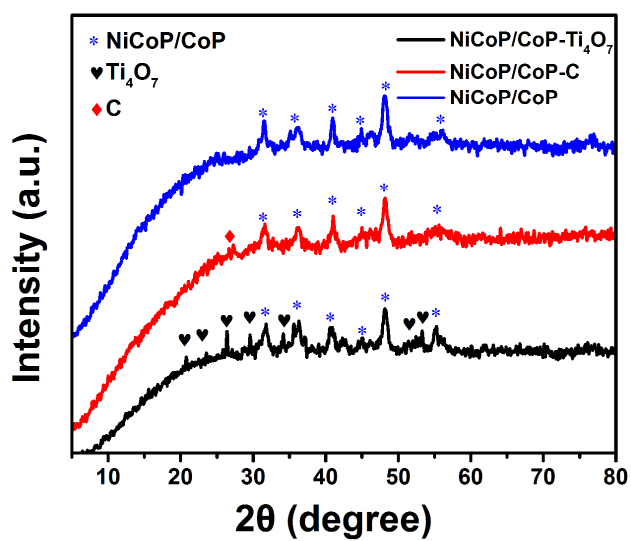

**Figure S2.** XRD patterns of  $\text{NiCoP/CoP-Ti}_4\text{O}_7$ ,  $\text{NiCoP/CoP-C}$  and  $\text{NiCoP/CoP}$ .

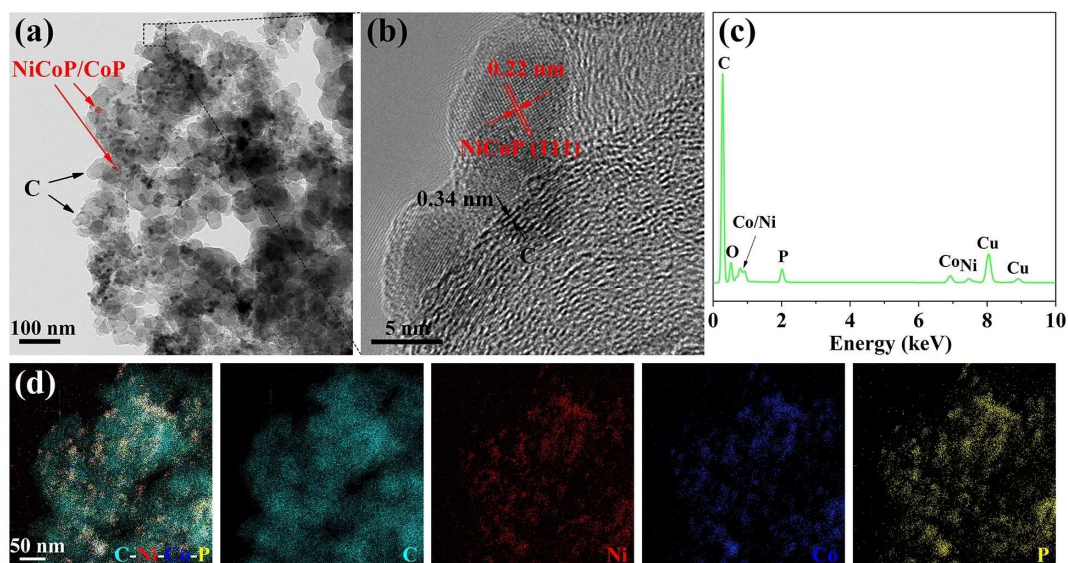

**Figure S3.** (a) TEM image, (b) HRTEM image, (c) EDX spectra and (d) EDX elemental mapping images of NiCoP/CoP-C.

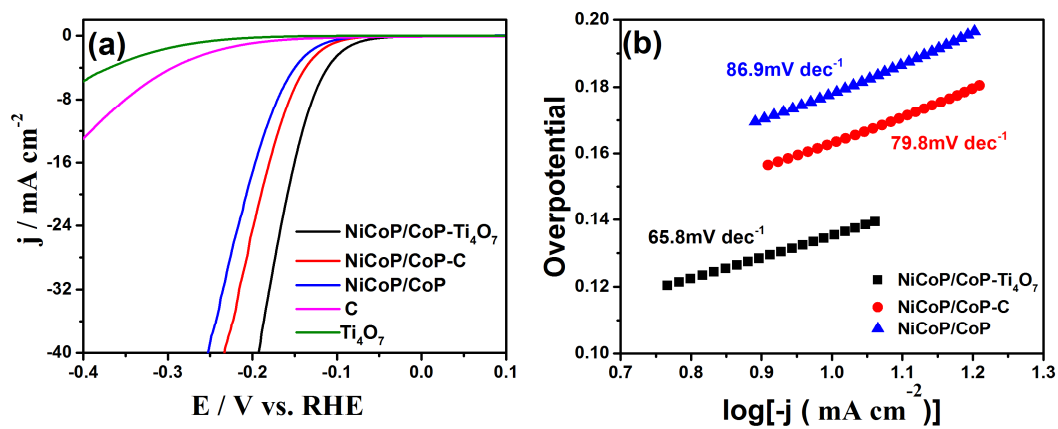

**Figure S4.** (a) LSV curves, (b) Tafel plots of NiCoP/CoP-Ti<sub>4</sub>O<sub>7</sub>, NiCoP/CoP-C and NiCoP/CoP (using carbon rod as the counter electrode).

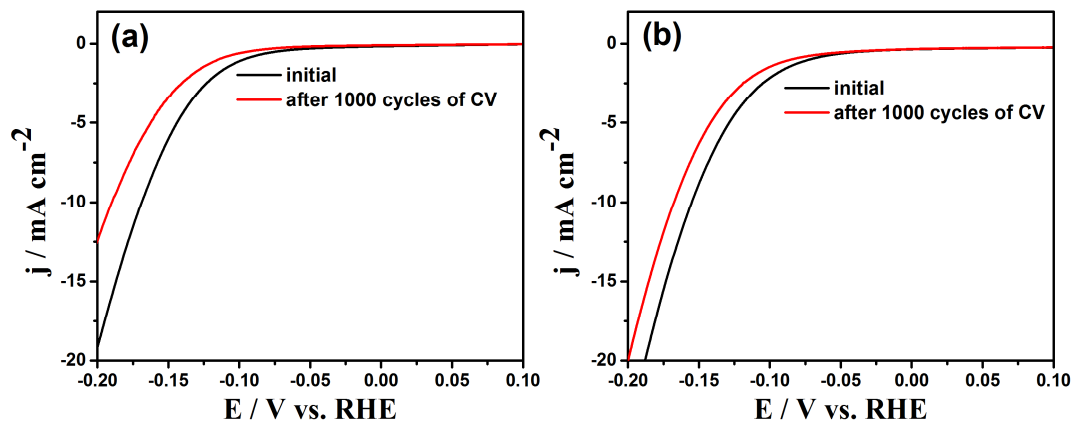

**Figure S5.** LSV curve comparison before and after 1000 cycles of CV for (a) NiCoP/CoP and (b) NiCoP/CoP-C.

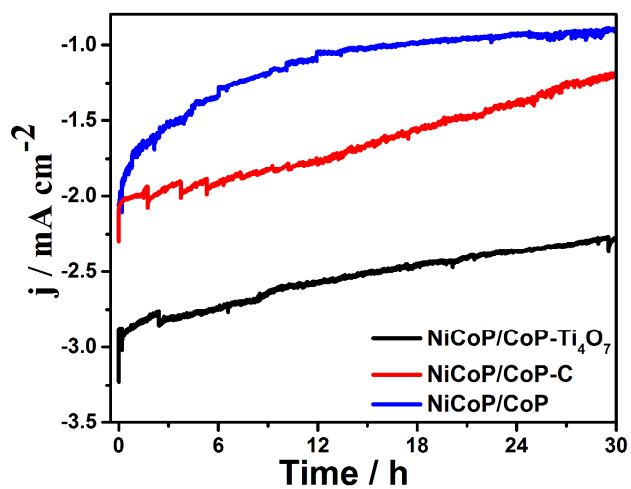

**Figure S6.** I-t curves of NiCoP/CoP-Ti<sub>4</sub>O<sub>7</sub>, NiCoP/CoP-C and NiCoP/CoP.

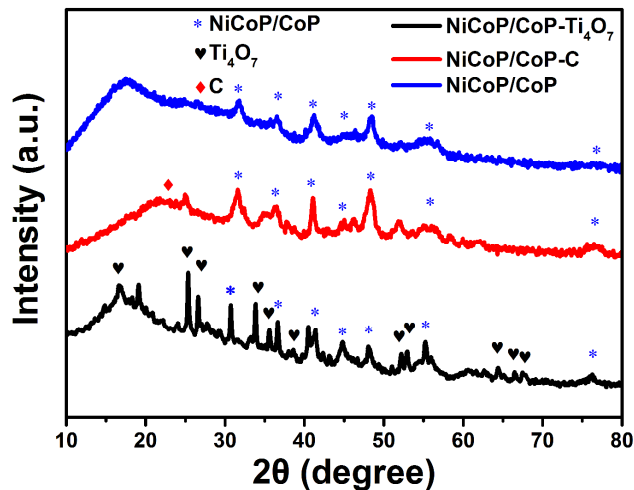

Figure S7. XRD patterns of NiCoP/CoP-Ti<sub>4</sub>O<sub>7</sub>, NiCoP/CoP-C and NiCoP/CoP after 30 h of I-t measurements.

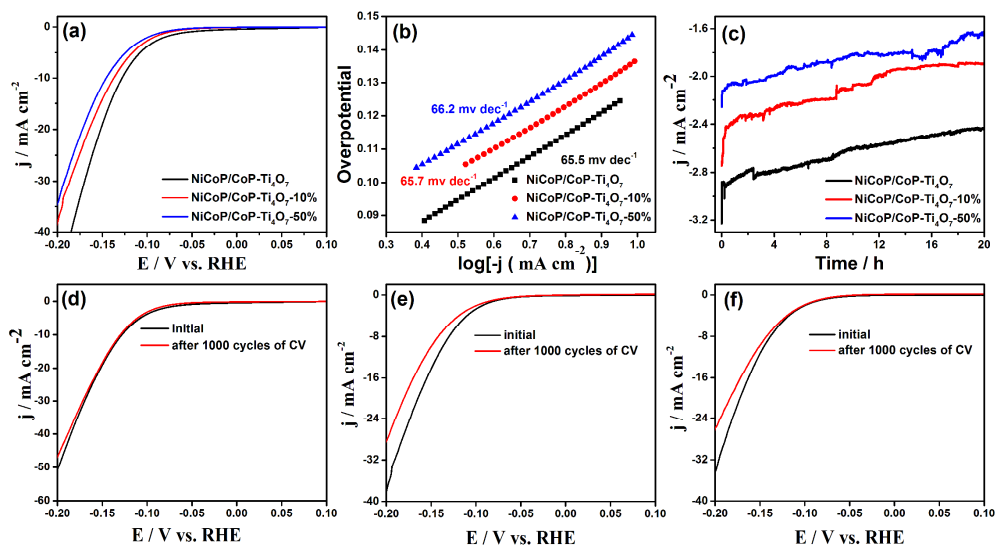

Figure S8. (a) LSV curves, (b) Tafel plots, (c) I-t curves of NiCoP/CoP-Ti<sub>4</sub>O<sub>7</sub>, NiCoP/CoP-10% and NiCoP/CoP-50%, LSV curve comparison before and after 1000 cycles of CV for (d) NiCoP/CoP-Ti<sub>4</sub>O<sub>7</sub>, (e) NiCoP/CoP-Ti<sub>4</sub>O<sub>7</sub>-10% and (f) NiCoP/CoP-Ti<sub>4</sub>O<sub>7</sub>-50%.

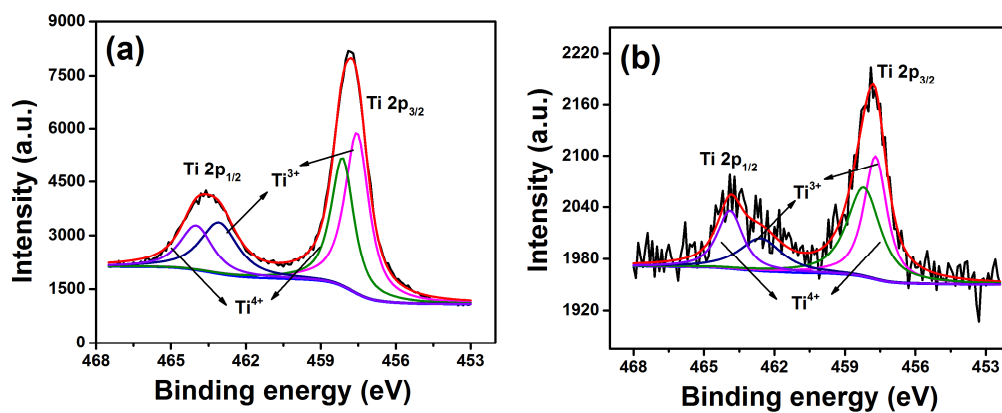

**Figure S9.** (a-b) XPS spectra of Ti (2p) for  $\text{Ti}_4\text{O}_7$  and  $\text{NiCoP/CoP-Ti}_4\text{O}_7$ , respectively.

**Table S1.** The catalytic performance of NiCoP/CoP-Ti<sub>4</sub>O<sub>7</sub>, NiCoP/CoP-C, NiCoP/CoP and other reported electrocatalysts towards HER in 0.5 M H<sub>2</sub>SO<sub>4</sub>.

|                                            | Loading mass<br>(mg cm <sup>-2</sup> ) | E <sub>onset</sub><br>(mV) | E <sub>10mA cm<sup>-2</sup></sub><br>(mV) | Tafel slope<br>(mV dec <sup>-1</sup> ) | Ref.      |
|--------------------------------------------|----------------------------------------|----------------------------|-------------------------------------------|----------------------------------------|-----------|
| NiCoP/CoP-Ti <sub>4</sub> O <sub>7</sub>   | 0.199                                  | 48                         | 128                                       | 65.5                                   | this work |
| NiCoP/CoP-C                                | 0.199                                  | 75                         | 156                                       | 79.3                                   |           |
| NiCoP/CoP                                  | 0.199                                  | 92                         | 171                                       | 86.3                                   |           |
| CoS <sub>2</sub> film                      | /                                      | /                          | 190                                       | 51.4                                   | (S1)      |
| CoS <sub>2</sub> MW                        | 25                                     | /                          | 158                                       | 58                                     |           |
| CoS <sub>2</sub> NW                        | 1.7                                    | /                          | 145                                       | 51.6                                   |           |
| MoS <sub>2</sub> /CNFs                     | /                                      | 64                         | 190                                       | 110                                    | (S2)      |
| WS <sub>2(1-x)</sub> Se <sub>2x</sub> -CFs | 0.21                                   | 190                        | 250                                       | 105                                    | (S3)      |
| MoS <sub>2</sub> /CoS <sub>2</sub>         | 18.6                                   | /                          | 87                                        | 73.4                                   | (S4)      |

#### Synthesis of NiCo<sub>2</sub>O<sub>4</sub>-Ti<sub>4</sub>O<sub>7</sub>-10% and NiCo<sub>2</sub>O<sub>4</sub>-Ti<sub>4</sub>O<sub>7</sub>-50%

NiCo<sub>2</sub>O<sub>4</sub> nanowires were synthesized by the hydrothermal method and calcination. First of all, 291 mg of Co(NO<sub>3</sub>)<sub>2</sub>·6H<sub>2</sub>O, 145 mg of Ni(NO<sub>3</sub>)<sub>2</sub>·6H<sub>2</sub>O and 300 mg of urea were dissolved in 35 mL deionized water and stirred for 30 min to form a homogeneous solution. After that, 13.7 or 123 mg of Ti<sub>4</sub>O<sub>7</sub> was uniformly dispersed in the solution and sonicated for 30 min. Next, the as-prepared compounds were transferred into a 50 mL Teflon-lined stainless autoclave and heated at 120 °C for 6 h. Afterward, the autoclave was naturally cooled down to room temperature. The black

precipitate was washed four to five times with deionized water and ethanol, respectively, and then dried in a vacuum oven at 60 °C for 8 h. Finally, it was annealed at 250 °C in N<sub>2</sub> for 2 h with a heating rate of 2 °C min<sup>-1</sup>. The obtained materials were denoted as NiCoP/CoP-Ti<sub>4</sub>O<sub>7</sub>-10% and NiCoP/CoP-Ti<sub>4</sub>O<sub>7</sub>-50%, respectively.

#### **Synthesis of NiCoP/CoP-Ti<sub>4</sub>O<sub>7</sub>-10% and NiCoP/CoP-Ti<sub>4</sub>O<sub>7</sub>-50%**

100 mg of NiCo<sub>2</sub>O<sub>4</sub>-Ti<sub>4</sub>O<sub>7</sub>-10% and NiCo<sub>2</sub>O<sub>4</sub>-Ti<sub>4</sub>O<sub>7</sub>-50% were mixed with 500 mg sodium hypophosphite using a mortar to grind into powder, respectively. Subsequently, the samples were heated at 300 °C for 120 min under N<sub>2</sub> atmosphere. The obtained catalysts were denoted as NiCoP/CoP-Ti<sub>4</sub>O<sub>7</sub>-10% and NiCoP/CoP-Ti<sub>4</sub>O<sub>7</sub>-50%, respectively.

## References

- (S1) Faber, M. S.; Dzedzic, R.; Lukowski, M. A.; Kaiser, N. S.; Ding, Q.; Jin, S.; High-Performance Electrocatalysis Using Metallic Cobalt Pyrite ( $\text{CoS}_2$ ) Micro and Nanostructures. *J. Am. Chem. Soc.* **2014**, *136* (28), 10053-10061.
- (S2) Zhu, H.; Zhang, J. F.; Du, M. L.; Wang, Q. F.; Gao, G. H.; Wu, J. D.; Wu, G. M.; Zhang, M.; Liu, B.; Yao, J. M.; Zhang, X. W. When cubic cobalt sulfide meets layered molybdenum disulfide: a core-shell system toward synergetic electrocatalytic water splitting. *Adv. Mater.* **2015**, *27* (32), 4752-4759.
- (S3) Xu, K.; Wang, F. M.; Wang, Z. X.; Zhan, X. Y.; Wang, Q. S.; Cheng, Z. Z.; Safdar, M.; He, J. Component-Controllable  $\text{WS}_{2(1-x)}\text{Se}_{2x}$  Nanotubes for Efficient Hydrogen Evolution Reaction. *Acs Nano* **2018**, *8* (8), 8468-8476.
- (S4) Huang, J. L.; Hou, D. M.; Zhou, Y. C.; Zhou, W. J.; Li, G. Q.; Tang, Z. H.; Li, L. G.; Chen, S. W.  $\text{MoS}_2$  nanosheet-coated  $\text{CoS}_2$  nanowire arrays on carbon cloth as three-dimensional electrodes for efficient electrocatalytic hydrogen evolution. *J. Mater. Chem. A* **2015**, *3* (45), 22886-22891.
